# Supplementary material
Source: Elsevier journal article supplement (https://rcastoragev2.blob.core.windows.net/8d02f18feb29f697d5284f515d96b9f4/mmc1.pdf)
Supplement: mmc1 [file mmc1.pdf]

# THE LANCET

## Public Health

### **Supplementary appendix**

This appendix formed part of the original submission and has been peer reviewed.  
We post it as supplied by the authors.

Supplement to: Kingston A, Comas-Herrera A, Jagger C. Forecasting the care needs of the older population in England over the next 20 years: estimates from the Population Ageing and Care Simulation (PACSim) modelling study. *Lancet Public Health* 2018; published online Aug 30. [http://dx.doi.org/10.1016/S2468-2667\(18\)30118-X](http://dx.doi.org/10.1016/S2468-2667(18)30118-X).

## Supplementary appendix

This appendix formed part of the original submission and has been peer reviewed.

Supplement to: Kingston A, Comas-Herrera A, Jagger C, for the MODEM project. Forecasting the care needs of the older population in England over the next 20 years: estimates from the Population Ageing and Care Simulation (PACSim) modelling study. *Lancet Public Health* 2018; published online Aug 30. [http://dx.doi.org/10.1016/S2468-2667\(18\)30118-X](http://dx.doi.org/10.1016/S2468-2667(18)30118-X)

## Contents

|                                                                                                                                                                                                                           |    |
|---------------------------------------------------------------------------------------------------------------------------------------------------------------------------------------------------------------------------|----|
| Results.....                                                                                                                                                                                                              | 4  |
| Table S.1: Prevalence of dependency of older adults in England in 2015, 2025 and 2035, by age....                                                                                                                         | 4  |
| Table S.2: Projected numbers of older men in England with dependency (in thousands) in 2015, 2025 and 2035, by age.....                                                                                                   | 5  |
| Table S.3: Projected numbers of older women in England with dependency (in thousands) in 2015, 2025 and 2035, by age .....                                                                                                | 6  |
| Table S.4: Prevalence of dependency of older adults in England in 2015, 2025 and 2035, by age and gender.....                                                                                                             | 7  |
| Table S.5: Projected proportion (%) of older adults aged $\geq 65$ years in England with substantial (moderate or high) dependency with and without dementia who have other comorbidity, 2015, 2025 and 2035 .....        | 8  |
| Table S.6: Projected proportion (%) of older men and women aged $\geq 65$ years in England with substantial (moderate or high) dependency with and without dementia who have other comorbidity, 2015, 2025 and 2035 ..... | 9  |
| Table S.7: Projected numbers (thousands) of older men aged $\geq 65$ years in England who have substantial (moderate or high) dependency with and without dementia and other comorbidity, 2015, 2025 and 2035 .....       | 10 |
| Table S.8: Projected numbers (thousands) of older women aged $\geq 65$ years in England who have substantial (moderate or high) dependency with and without dementia and other comorbidity, 2015, 2025 and 2035 .....     | 11 |
| Figure S.1: Proportion of older individuals with low dependency in England in 2015, 2020, 2025, 2030, 2035 by five year birth cohort and sex .....                                                                        | 12 |
| Figure S.2: Proportion of older individuals with medium dependency in England in 2015, 2020, 2025, 2030, 2035 by five year birth cohort and sex .....                                                                     | 13 |
| Figure S.3: Proportion of older individuals with high dependency in England in 2015, 2020, 2025, 2030, 2035 by five year birth cohort and sex .....                                                                       | 14 |
| Methods.....                                                                                                                                                                                                              | 15 |
| <i>Base population</i> .....                                                                                                                                                                                              | 15 |
| <i>Transition probabilities</i> .....                                                                                                                                                                                     | 15 |
| <i>Model validation</i> .....                                                                                                                                                                                             | 15 |
| Table S.9: Modelled transition relationships between variables .....                                                                                                                                                      | 16 |
| Table S.10: Life expectancies at age 65 from PACSim (with range from repeated simulations) and from ONS 2014 projections, 2015, 2025, 2035 by sex.....                                                                    | 17 |
| Figure S.4: Comparison of baseline proportion with low education and proportion of current smokers by study and age group .....                                                                                           | 18 |
| Figure S.5: Comparison of baseline proportion with hypertension, coronary heart disease (CHD), stroke, and diabetes by study and age group.....                                                                           | 19 |
| Figure S.6: Comparison of baseline proportion with arthritis, respiratory disease, cancer, and depression by study and age group .....                                                                                    | 20 |

|                                                                                                                                              |    |
|----------------------------------------------------------------------------------------------------------------------------------------------|----|
| Figure S.7: Comparison of baseline proportion with hearing and visual impairment by study and age group .....                                | 21 |
| Figure S.8: Comparison of number of individuals in England by age group and year from PACSim with ONS 2014-based population projections..... | 22 |
| Research in context.....                                                                                                                     | 23 |
| Table S.11: Results of literature review on dynamic microsimulation models .....                                                             | 24 |
| References .....                                                                                                                             | 25 |

## Results

**Table S.1: Prevalence of dependency of older adults in England in 2015, 2025 and 2035, by age.**

|                    | <b>2015</b>      | <b>2025</b>      | <b>2035</b>      |
|--------------------|------------------|------------------|------------------|
| <i>65-74 years</i> |                  |                  |                  |
| Independent        | 69.3 (69.0-69.5) | 79.2 (79.1-79.7) | 81.1 (81.1-81.4) |
| Low dependency     | 21.7 (21.7-22.1) | 14.2 (13.9-14.2) | 14.0 (13.7-14.0) |
| Medium dependency  | 3.7 (3.5-3.7)    | 2.3 (2.2-2.3)    | 1.4 (1.4-1.5)    |
| High dependency    | 5.4 (5.3-5.4)    | 4.4 (4.1-4.4)    | 3.5 (3.3-3.5)    |
| <i>75-84 years</i> |                  |                  |                  |
| Independent        | 50.8 (50.7-51.2) | 59.4 (58.8-59.5) | 58.8 (58.5-59.2) |
| Low dependency     | 34.6 (34.4-35.1) | 28.4 (28.4-29.3) | 29.6 (29.2-29.7) |
| Medium dependency  | 6.0 (5.6-6.0)    | 4.7 (4.4-4.7)    | 3.6 (3.5-3.9)    |
| High dependency    | 8.5 (8.4-8.7)    | 7.4 (7.2-7.6)    | 8.0 (7.9-8.1)    |
| <i>≥85 years</i>   |                  |                  |                  |
| Independent        | 22.4 (22.2-22.6) | 20.4 (20.3-21.2) | 19.1 (18.9-19.9) |
| Low dependency     | 47.1 (46.7-47.5) | 51.9 (51.3-52.3) | 54.6 (54.1-55.3) |
| Medium dependency  | 12.9 (12.6-13.1) | 10.2 (9.7-10.4)  | 10.4 (10.0-10.6) |
| High dependency    | 17.7 (17.4-18.0) | 17.5 (16.9-17.5) | 15.9 (15.4-15.9) |
| <i>≥65 years</i>   |                  |                  |                  |
| Independent        | 57.0 (56.9-57.2) | 63.1 (63.0-63.3) | 61.7 (61.7-62.0) |
| Low dependency     | 29.3 (29.2-29.6) | 25.1 (25.0-25.3) | 27.0 (26.7-27.0) |
| Medium dependency  | 5.7 (5.4-5.7)    | 4.3 (4.2-4.4)    | 3.9 (3.8-4.0)    |
| High dependency    | 8.1 (8.0-8.1)    | 7.5 (7.2-7.5)    | 7.4 (7.2-7.4)    |

Data in parentheses are minimum and maximum from ten simulations

**Table S.2: Projected numbers of older men in England with dependency (in thousands) in 2015, 2025 and 2035, by age**

|                      |                  |                  |                  | relative change (%) |                     |
|----------------------|------------------|------------------|------------------|---------------------|---------------------|
| <b>MEN</b>           | <b>2015</b>      | <b>2025</b>      | <b>2035</b>      | <b>2015-2025</b>    | <b>2015-2035</b>    |
| <i>65-74 years</i>   |                  |                  |                  |                     |                     |
| independent          | 1794 (1794-1808) | 2399 (2384-2412) | 2983 (2969-2993) | 33.7 (31.9-34.3)    | 66.3 (64.8-66.3)    |
| low dependency       | 512 (506-521)    | 224 (220-231)    | 280 (266-287)    | -56.0 (-58.0--55.0) | -45.0 (-48.0--45.0) |
| medium dependency    | 101 (94-101)     | 47 (42-47)       | 27 (24-30)       | -53.0 (-56.0--51.0) | -73.0 (-74.0--68.0) |
| high dependency      | 137 (135-138)    | 84 (84-90)       | 60 (58-65)       | -39.0 (-39.0--33.0) | -56.0 (-57.0--52.0) |
| <i>75-79 years</i>   |                  |                  |                  |                     |                     |
| independent          | 784 (784-811)    | 1405 (1371-1405) | 1595 (1573-1595) | 79.2 (70.3-79.2)    | 103.0 (94.2-103.0)  |
| low dependency       | 411 (404-411)    | 389 (389-412)    | 472 (470-490)    | -5.4 (-5.4-2.0)     | 14.9 (14.6-21.0)    |
| medium dependency    | 91 (84-91)       | 79 (72-79)       | 54 (53-61)       | -12.0 (-17.0--8.1)  | -40.0 (-40.0--30.0) |
| high dependency      | 111 (108-114)    | 106 (105-110)    | 105 (105-114)    | -4.2 (-6.3--0.2)    | -5.6 (-6.0-4.3)     |
| <i>≥85 years</i>     |                  |                  |                  |                     |                     |
| independent          | 142 (140-148)    | 223 (222-237)    | 352 (342-364)    | 57.1 (54.8-66.2)    | 147.0 (135.0-156.0) |
| low dependency       | 192 (183-194)    | 330 (322-336)    | 609 (596-630)    | 71.6 (66.9-82.6)    | 217.0 (208.0-243.0) |
| medium dependency    | 63 (62-66)       | 68 (62-71)       | 112 (107-115)    | 7.6 (-5.5-13.4)     | 77.0 (66.9-83.6)    |
| high dependency      | 60 (58-62)       | 82 (76-83)       | 119 (111-119)    | 38.0 (26.0-42.5)    | 101.0 (79.0-101.0)  |
| <i>All ≥65 years</i> |                  |                  |                  |                     |                     |
| independent          | 2720 (2720-2765) | 4027 (4001-4036) | 4930 (4897-4931) | 48.0 (45.0-48.0)    | 81.2 (77.4-81.2)    |
| low dependency       | 1116 (1098-1119) | 943 (943-970)    | 1361 (1353-1387) | -15.0 (-15.0--12.0) | 22.0 (21.5-24.9)    |
| medium dependency    | 254 (241-254)    | 194 (179-194)    | 193 (190-201)    | -24.0 (-28.0--21.0) | -24.0 (-24.0--18.0) |
| high dependency      | 307 (305-311)    | 272 (268-281)    | 284 (281-293)    | -11.0 (-13.0--9.2)  | -7.6 (-9.6--5.2)    |

Data in parentheses are minimum and maximum from ten simulations

**Table S.3: Projected numbers of older women in England with dependency (in thousands) in 2015, 2025 and 2035, by age**

|                      |                  |                  |                  | relative change (%) |                     |
|----------------------|------------------|------------------|------------------|---------------------|---------------------|
| <b>WOMEN</b>         | <b>2015</b>      | <b>2025</b>      | <b>2035</b>      | <b>2015-2025</b>    | <b>2015-2035</b>    |
| <i>65-74 years</i>   |                  |                  |                  |                     |                     |
| independent          | 1861 (1847-1861) | 2095 (2095-2120) | 2619 (2619-2645) | 12.6 (12.6-14.4)    | 40.8 (40.8-43.2)    |
| low dependency       | 632 (632-647)    | 582 (566-582)    | 687 (676-694)    | -7.9 (-11.0--7.9)   | 8.7 (6.2-8.9)       |
| medium dependency    | 93 (88-93)       | 82 (82-88)       | 71 (71-79)       | -11.0 (-11.0--0.9)  | -23.0 (-23.0--11.0) |
| high dependency      | 147 (146-149)    | 165 (151-165)    | 181 (168-183)    | 11.7 (2.7-11.7)     | 22.9 (15.1-22.9)    |
| <i>75-79 years</i>   |                  |                  |                  |                     |                     |
| independent          | 807 (787-807)    | 1130 (1122-1138) | 1182 (1182-1214) | 40.0 (40.0-43.9)    | 46.6 (46.6-53.6)    |
| low dependency       | 673 (673-694)    | 824 (814-840)    | 928 (908-937)    | 22.5 (19.0-23.1)    | 38.0 (32.2-38.0)    |
| medium dependency    | 99 (89-99)       | 121 (117-126)    | 117 (114-125)    | 22.2 (22.2-38.4)    | 18.8 (18.8-38.2)    |
| high dependency      | 155 (155-161)    | 211 (203-215)    | 273 (259-276)    | 36.2 (28.1-37.2)    | 76.1 (65.0-76.6)    |
| <i>≥85 years</i>     |                  |                  |                  |                     |                     |
| independent          | 153 (147-154)    | 136 (131-139)    | 187 (185-198)    | -11.0 (-13.0--6.6)  | 22.4 (22.4-33.7)    |
| low dependency       | 428 (428-436)    | 586 (576-592)    | 928 (906-931)    | 36.8 (32.4-36.8)    | 117.0 (108.0-117.0) |
| medium dependency    | 106 (101-108)    | 112 (109-115)    | 181 (169-182)    | 4.9 (1.6-13.1)      | 70.5 (62.2-74.0)    |
| high dependency      | 173 (167-176)    | 227 (219-227)    | 327 (323-329)    | 31.2 (25.1-33.7)    | 88.7 (85.9-95.4)    |
| <i>All ≥65 years</i> |                  |                  |                  |                     |                     |
| independent          | 2820 (2794-2820) | 3361 (3361-3389) | 3989 (3989-4044) | 19.2 (19.2-21.3)    | 41.4 (41.4-44.6)    |
| low dependency       | 1733 (1733-1768) | 1991 (1965-1999) | 2543 (2489-2545) | 14.9 (11.9-14.9)    | 46.8 (41.8-46.8)    |
| medium dependency    | 298 (278-298)    | 315 (312-324)    | 370 (359-380)    | 5.6 (5.6-16.4)      | 24.2 (24.2-33.9)    |
| high dependency      | 476 (469-483)    | 603 (577-603)    | 781 (753-781)    | 26.8 (21.8-26.8)    | 64.2 (58.4-64.2)    |

Data in parentheses are minimum and maximum from ten simulations

**Table S.4: Prevalence of dependency of older adults in England in 2015, 2025 and 2035, by age and gender.**

|                          | <b>2015</b>      | <b>2025</b>      | <b>2035</b>      |
|--------------------------|------------------|------------------|------------------|
| <i>Men 65-74 years</i>   |                  |                  |                  |
| Independent              | 70.5 (70.5-71.0) | 87.1 (86.7-87.4) | 89.1 (88.9-89.4) |
| Low dependency           | 20.1 (19.9-20.4) | 8.1 (8.0-8.4)    | 8.4 (8.0-8.6)    |
| Medium dependency        | 4.0 (3.7-4.0)    | 1.7 (1.5-1.7)    | 0.8 (0.7-0.9)    |
| High dependency          | 5.4 (5.3-5.4)    | 3.0 (3.0-3.3)    | 1.8 (1.7-1.9)    |
| <i>Women 65-74 years</i> |                  |                  |                  |
| Independent              | 68.1 (67.6-68.2) | 71.7 (71.7-72.4) | 73.6 (73.6-74.0) |
| Low dependency           | 23.1 (23.1-23.7) | 19.9 (19.3-19.9) | 19.3 (18.9-19.4) |
| Medium dependency        | 3.4 (3.2-3.4)    | 2.8 (2.8-3.0)    | 2.0 (2.0-2.2)    |
| High dependency          | 5.4 (5.3-5.5)    | 5.6 (5.1-5.6)    | 5.1 (4.7-5.1)    |
| <i>Men 75-84 years</i>   |                  |                  |                  |
| Independent              | 56.1 (56.1-57.5) | 71.0 (69.8-71.0) | 71.7 (70.6-71.7) |
| Low dependency           | 29.4 (28.7-29.4) | 19.7 (19.7-20.9) | 21.2 (21.0-21.9) |
| Medium dependency        | 6.5 (5.9-6.5)    | 4.0 (3.6-4.0)    | 2.4 (2.4-2.8)    |
| High dependency          | 7.9 (7.6-8.1)    | 5.4 (5.3-5.5)    | 4.7 (4.7-5.1)    |
| <i>Women 75-84 years</i> |                  |                  |                  |
| Independent              | 46.5 (45.6-46.5) | 49.4 (49.2-49.9) | 47.3 (47.3-48.5) |
| Low dependency           | 38.8 (38.8-40.1) | 36.1 (35.6-36.6) | 37.1 (36.2-37.1) |
| Medium dependency        | 5.7 (5.2-5.7)    | 5.3 (5.1-5.5)    | 4.7 (4.5-5.0)    |
| High dependency          | 8.9 (8.9-9.3)    | 9.2 (8.9-9.4)    | 10.9 (10.4-11.0) |
| <i>Men ≥85 years</i>     |                  |                  |                  |
| Independent              | 31.1 (30.8-32.4) | 31.8 (31.6-33.4) | 29.5 (28.6-30.7) |
| Low dependency           | 42.1 (40.1-42.1) | 46.9 (45.9-47.8) | 51.1 (50.4-52.7) |
| Medium dependency        | 13.8 (13.5-14.2) | 9.6 (8.8-9.9)    | 9.4 (9.0-9.7)    |
| High dependency          | 13.0 (12.8-13.8) | 11.7 (10.9-11.8) | 10.0 (9.3-10.0)  |
| <i>Women ≥85 years</i>   |                  |                  |                  |
| Independent              | 17.8 (17.2-17.8) | 12.8 (12.4-13.2) | 11.5 (11.5-12.2) |
| Low dependency           | 49.8 (49.7-50.8) | 55.2 (54.9-55.7) | 57.2 (56.3-57.7) |
| Medium dependency        | 12.4 (11.8-12.5) | 10.5 (10.3-10.9) | 11.2 (10.5-11.3) |
| High dependency          | 20.1 (19.4-20.5) | 21.4 (20.9-21.6) | 20.1 (20.0-20.5) |
| <i>Men ≥65 years</i>     |                  |                  |                  |
| Independent              | 61.9 (61.9-62.6) | 74.1 (73.7-74.1) | 72.8 (72.4-72.9) |
| Low dependency           | 25.4 (24.9-25.4) | 17.3 (17.3-17.8) | 20.1 (20.0-20.5) |
| Medium dependency        | 5.8 (5.5-5.8)    | 3.6 (3.3-3.6)    | 2.8 (2.8-3.0)    |
| High dependency          | 7.0 (6.9-7.1)    | 5.0 (4.9-5.2)    | 4.2 (4.2-4.3)    |
| <i>Women ≥65 years</i>   |                  |                  |                  |
| Independent              | 52.9 (52.5-52.9) | 53.6 (53.6-54.1) | 51.9 (51.9-52.7) |
| Low dependency           | 32.5 (32.5-33.2) | 31.8 (31.4-31.8) | 33.1 (32.4-33.1) |
| Medium dependency        | 5.6 (5.2-5.6)    | 5.0 (5.0-5.2)    | 4.8 (4.7-4.9)    |
| High dependency          | 8.9 (8.8-9.1)    | 9.6 (9.2-9.6)    | 10.2 (9.8-10.2)  |

Data in parentheses are minimum and maximum from ten simulations

**Table S.5: Projected proportion (%) of older adults aged  $\geq 65$  years in England with substantial (moderate or high) dependency with and without dementia who have other comorbidity, 2015, 2025 and 2035**

|                                                | 2015               | 2025               | 2035               |
|------------------------------------------------|--------------------|--------------------|--------------------|
| <i>Substantial dependency with dementia</i>    |                    |                    |                    |
| Dementia alone                                 | 12.5 (12.5 - 14.8) | 5.3 (4.5 - 5.7)    | 3.9 (3.6 - 4.2)    |
| With 1 other disease                           | 28.6 (26.6 - 28.6) | 16.9 (16.9 - 18.6) | 14.9 (14.6 - 15.7) |
| With 2+ other diseases                         | 58.8 (57.7 - 58.8) | 77.8 (76.3 - 77.8) | 81.2 (80.2 - 81.6) |
| <i>Substantial dependency without dementia</i> |                    |                    |                    |
| 0-1 disease                                    | 39.4 (39.3 - 40.4) | 19.9 (19.6 - 20.9) | 12.1 (10.7 - 12.1) |
| 2 diseases                                     | 29.1 (28.1 - 29.1) | 26.3 (25.8 - 28.5) | 22.2 (22.2 - 23.8) |
| 3+ diseases                                    | 31.5 (31.3 - 32.1) | 53.8 (51.9 - 54.1) | 65.8 (64.6 - 66.4) |
| <i>Substantial dependency ALL</i>              |                    |                    |                    |
| 0-1 disease                                    | 31.2 (31.2 - 32.4) | 13.0 (12.5 - 13.5) | 7.5 (6.9 - 7.6)    |
| 2 diseases                                     | 29.0 (27.7 - 29.0) | 21.8 (21.8 - 23.7) | 18.2 (18.2 - 19.2) |
| 3+ diseases                                    | 39.8 (39.5 - 40.5) | 65.2 (63.7 - 65.2) | 74.3 (73.3 - 74.7) |

Data in parentheses are minimum and maximum from ten simulations

**Table S.6: Projected proportion (%) of older men and women aged  $\geq 65$  years in England with substantial (moderate or high) dependency with and without dementia who have other comorbidity, 2015, 2025 and 2035**

|                                                       | 2015               | 2025               | 2035               |
|-------------------------------------------------------|--------------------|--------------------|--------------------|
| <i>Substantial dependency with dementia, men</i>      |                    |                    |                    |
| Dementia alone                                        | 13.5 (13.5 - 18.2) | 6.6 (5.2 - 6.6)    | 3.8 (3.2 - 4.5)    |
| With 1 other disease                                  | 27.5 (25.3 - 27.5) | 15.1 (15.1 - 20.3) | 14.8 (13.3 - 15.9) |
| With 2+ other diseases                                | 59.0 (56.1 - 59.0) | 78.3 (74.3 - 78.3) | 81.4 (80.2 - 82.6) |
| <i>Substantial dependency with dementia, women</i>    |                    |                    |                    |
| Dementia alone                                        | 12.1 (12.1 - 13.4) | 4.8 (4.2 - 5.3)    | 3.9 (3.5 - 4.1)    |
| With 1 other disease                                  | 29.1 (27.1 - 29.1) | 17.6 (16.5 - 18.4) | 15.0 (14.2 - 16.0) |
| With 2+ other diseases                                | 58.8 (57.9 - 59.5) | 77.6 (76.4 - 78.8) | 81.1 (80.0 - 81.9) |
| <i>Substantial dependency without dementia, men</i>   |                    |                    |                    |
| 0-1 disease                                           | 40.8 (40.3 - 41.6) | 18.6 (18.5 - 20.0) | 7.6 (7.3 - 8.3)    |
| 2 diseases                                            | 28.9 (28.3 - 30.1) | 23.9 (22.3 - 25.9) | 17.8 (16.2 - 19.1) |
| 3+ diseases                                           | 30.2 (29.5 - 30.8) | 57.5 (55.6 - 58.9) | 74.6 (72.6 - 75.5) |
| <i>Substantial dependency without dementia, women</i> |                    |                    |                    |
| 0-1 disease                                           | 38.1 (38.1 - 39.5) | 20.6 (19.6 - 21.6) | 14.1 (12.1 - 14.2) |
| 2 diseases                                            | 29.3 (27.5 - 29.3) | 27.8 (27.5 - 30.0) | 24.2 (24.2 - 26.1) |
| 3+ diseases                                           | 32.7 (32.5 - 33.5) | 51.6 (49.8 - 52.0) | 61.6 (59.8 - 62.6) |
| <i>Substantial dependency ALL, men</i>                |                    |                    |                    |
| 0-1 disease                                           | 34.9 (34.9 - 36.3) | 13.6 (12.8 - 13.9) | 5.7 (5.4 - 6.3)    |
| 2 diseases                                            | 28.6 (27.6 - 29.2) | 20.2 (20.2 - 23.4) | 16.2 (15.5 - 17.1) |
| 3+ diseases                                           | 36.5 (35.3 - 36.7) | 66.2 (63.8 - 66.2) | 78.1 (76.7 - 78.5) |
| <i>Substantial dependency ALL, women</i>              |                    |                    |                    |
| 0-1 disease                                           | 28.5 (28.5 - 29.7) | 12.7 (11.9 - 13.3) | 8.3 (7.4 - 8.3)    |
| 2 diseases                                            | 29.2 (27.7 - 29.2) | 22.7 (22.3 - 23.9) | 18.9 (18.9 - 20.4) |
| 3+ diseases                                           | 42.3 (42.1 - 43.2) | 64.7 (63.2 - 64.9) | 72.7 (71.3 - 73.6) |

Data in parentheses are minimum and maximum from ten simulations

**Table S.7: Projected numbers (thousands) of older men aged ≥65 years in England who have substantial (moderate or high) dependency with and without dementia and other comorbidity, 2015, 2025 and 2035**

| MEN                                     | 2015            | 2025            | 2035            | Relative change (%)   |                       |
|-----------------------------------------|-----------------|-----------------|-----------------|-----------------------|-----------------------|
|                                         |                 |                 |                 | 2015-2025             | 2015-2035             |
| Substantial dependency with dementia    |                 |                 |                 |                       |                       |
| Dementia alone                          | 16 (16 - 22)    | 13 (10 - 13)    | 9 (8 - 11)      | -20.7 (-53.3 - -20.7) | -42.7 (-62.4 - -42.7) |
| With 1 other disease                    | 33 (31 - 33)    | 30 (30 - 40)    | 36 (33 - 38)    | -11.4 (-11.4 - 28.3)  | 8.1 (2.2 - 24.3)      |
| With 2+ diseases                        | 72 (68 - 72)    | 154 (142 - 154) | 199 (194 - 207) | 114.1 (100.3 - 124.4) | 177.5 (173.1 - 202.2) |
| Substantial dependency without dementia |                 |                 |                 |                       |                       |
| 0-1 disease                             | 180 (173 - 182) | 50 (48 - 53)    | 18 (17 - 20)    | -72.0 (-73.2 - -70.0) | -90.1 (-90.5 - -88.5) |
| 2 diseases                              | 127 (122 - 130) | 65 (59 - 68)    | 41 (38 - 45)    | -49.2 (-52.9 - -44.2) | -67.5 (-69.3 - -64.4) |
| 3+ diseases                             | 133 (126 - 133) | 155 (144 - 156) | 173 (169 - 181) | 16.8 (10.0 - 20.0)    | 30.0 (30.0 - 39.1)    |
| Substantial dependency ALL              |                 |                 |                 |                       |                       |
| 0-1 disease                             | 196 (194 - 202) | 63 (58 - 64)    | 27 (26 - 30)    | -67.8 (-70.5 - 0.0)   | -86.2 (-86.7 - -84.6) |
| 2 diseases                              | 161 (154 - 162) | 94 (94 - 107)   | 77 (74 - 82)    | -41.3 (-41.3 - 0.0)   | -51.8 (-51.8 - -47.8) |
| 3+ diseases                             | 205 (196 - 205) | 309 (292 - 309) | 372 (370 - 384) | 50.9 (45.7 - 0.0)     | 81.7 (81.7 - 95.6)    |

Data in parentheses are minimum and maximum from ten simulations

**Table S.8: Projected numbers (thousands) of older women aged ≥65 years in England who have substantial (moderate or high) dependency with and without dementia and other comorbidity, 2015, 2025 and 2035**

| WOMEN                                   | 2015            | 2025            | 2035            | Relative change (%)   |                       |
|-----------------------------------------|-----------------|-----------------|-----------------|-----------------------|-----------------------|
|                                         |                 |                 |                 | 2015-2025             | 2015-2035             |
| Substantial dependency with dementia    |                 |                 |                 |                       |                       |
| Dementia alone                          | 34 (34 - 39)    | 22 (19 - 24)    | 26 (23 - 27)    | -36.0 (-48.9 - -30.9) | -24.7 (-37.4 - -23.8) |
| With 1 other disease                    | 83 (77 - 83)    | 81 (74 - 84)    | 98 (93 - 105)   | -1.9 (-8.0 - 5.1)     | 18.6 (15.7 - 32.3)    |
| With 2+ diseases                        | 167 (163 - 173) | 358 (345 - 362) | 533 (514 - 535) | 114.4 (105.4 - 118.0) | 219.0 (204.3 - 224.4) |
| Substantial dependency without dementia |                 |                 |                 |                       |                       |
| 0-1 disease                             | 186 (184 - 188) | 94 (90 - 97)    | 70 (60 - 70)    | -49.5 (-51.4 - -48.2) | -62.5 (-67.7 - -62.5) |
| 2 diseases                              | 143 (131 - 143) | 127 (124 - 136) | 120 (120 - 129) | -11.4 (-11.4 - 0.2)   | -16.3 (-16.3 - -2.8)  |
| 3+ diseases                             | 160 (154 - 161) | 235 (223 - 238) | 305 (293 - 311) | 47.2 (39.3 - 49.4)    | 90.4 (81.8 - 99.9)    |
| Substantial dependency ALL              |                 |                 |                 |                       |                       |
| 0-1 disease                             | 221 (221 - 226) | 116 (109 - 120) | 96 (85 - 96)    | -47.4 (-51.0 - -51.0) | -56.6 (-61.8 - -56.6) |
| 2 diseases                              | 226 (210 - 226) | 208 (202 - 218) | 218 (218 - 231) | -7.9 (-7.9 - -7.9)    | -3.5 (-3.5 - 9.2)     |
| 3+ diseases                             | 327 (321 - 332) | 594 (569 - 594) | 837 (808 - 843) | 81.6 (73.0 - 73.0)    | 156.1 (145.4 - 157.5) |

Data in parentheses are minimum and maximum from ten simulation

Figure S.1: Proportion of older individuals with low dependency in England in 2015, 2020, 2025, 2030, 2035 by five year birth cohort and sex

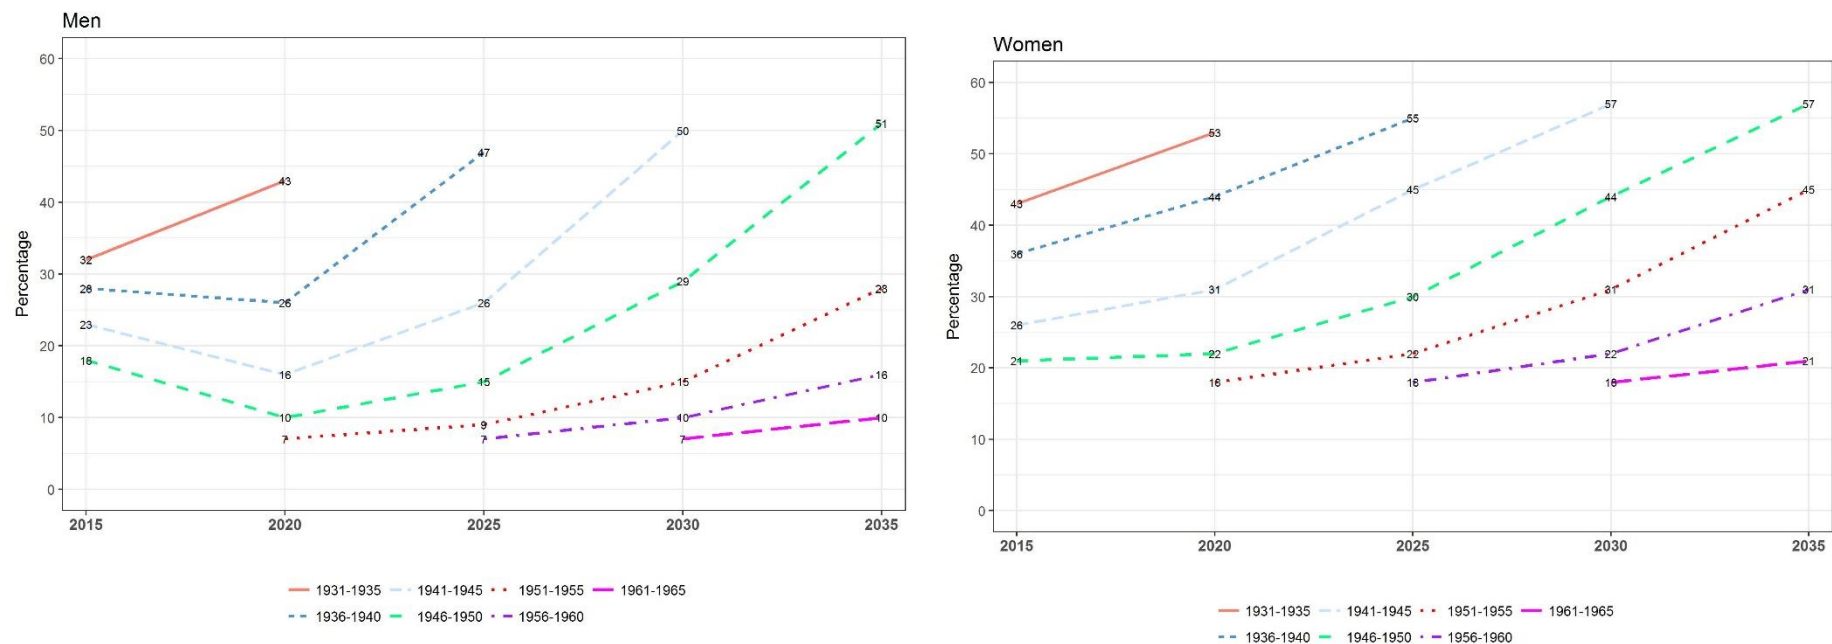

|           | Men              |                  |                  |                  |                  |  | Women            |                  |                  |                  |                  |
|-----------|------------------|------------------|------------------|------------------|------------------|--|------------------|------------------|------------------|------------------|------------------|
| Cohort    | 2015             | 2020             | 2025             | 2030             | 2035             |  | 2015             | 2020             | 2025             | 2030             | 2035             |
| 1931-1935 | 32.1 (31.9-32.8) | 43.0 (42.2-43.2) |                  |                  |                  |  | 42.9 (42.9-45.4) | 52.9 (52.9-54.5) |                  |                  |                  |
| 1936-1940 | 27.6 (26.0-27.6) | 25.9 (25.3-26.4) | 46.9 (45.9-47.8) |                  |                  |  | 35.7 (34.8-36.1) | 44.2 (42.7-44.2) | 55.2 (54.9-55.7) |                  |                  |
| 1941-1945 | 22.7 (22.7-23.6) | 16.2 (15.9-17.1) | 26.4 (26.4-28.4) | 49.8 (49.8-51.4) |                  |  | 26.3 (26.3-27.1) | 31.3 (30.7-31.4) | 44.6 (43.4-44.8) | 56.9 (56.5-57.6) |                  |
| 1946-1950 | 18.3 (17.5-18.3) | 10.3 (10.3-11.1) | 15.3 (15.2-16.2) | 28.6 (27.9-29.0) | 51.1 (50.4-52.7) |  | 20.7 (20.5-21.2) | 21.7 (21.3-22.6) | 30.1 (29.9-31.0) | 44.1 (43.2-44.6) | 57.2 (56.3-57.7) |
| 1951-1955 |                  | 7.3 (7.0-7.4)    | 9.2 (9.2-9.8)    | 15.5 (15.1-16.0) | 28.2 (27.8-28.8) |  |                  | 17.8 (17.2-18.4) | 22.2 (21.1-22.4) | 31.2 (30.3-31.2) | 44.8 (44.0-44.8) |
| 1956-1960 |                  |                  | 7.2 (6.8-7.6)    | 9.7 (9.3-10.1)   | 16.1 (15.7-16.7) |  |                  |                  | 17.9 (17.4-18.3) | 21.6 (21.5-22.1) | 30.9 (29.6-30.9) |
| 1961-1965 |                  |                  |                  | 6.9 (6.4-7.0)    | 10.2 (9.4-10.2)  |  |                  |                  |                  | 17.5 (16.8-17.5) | 21.3 (20.9-21.7) |

Data in parentheses are minimum and maximum from ten simulation

Figure S.2: Proportion of older individuals with medium dependency in England in 2015, 2020, 2025, 2030, 2035 by five year birth cohort and sex

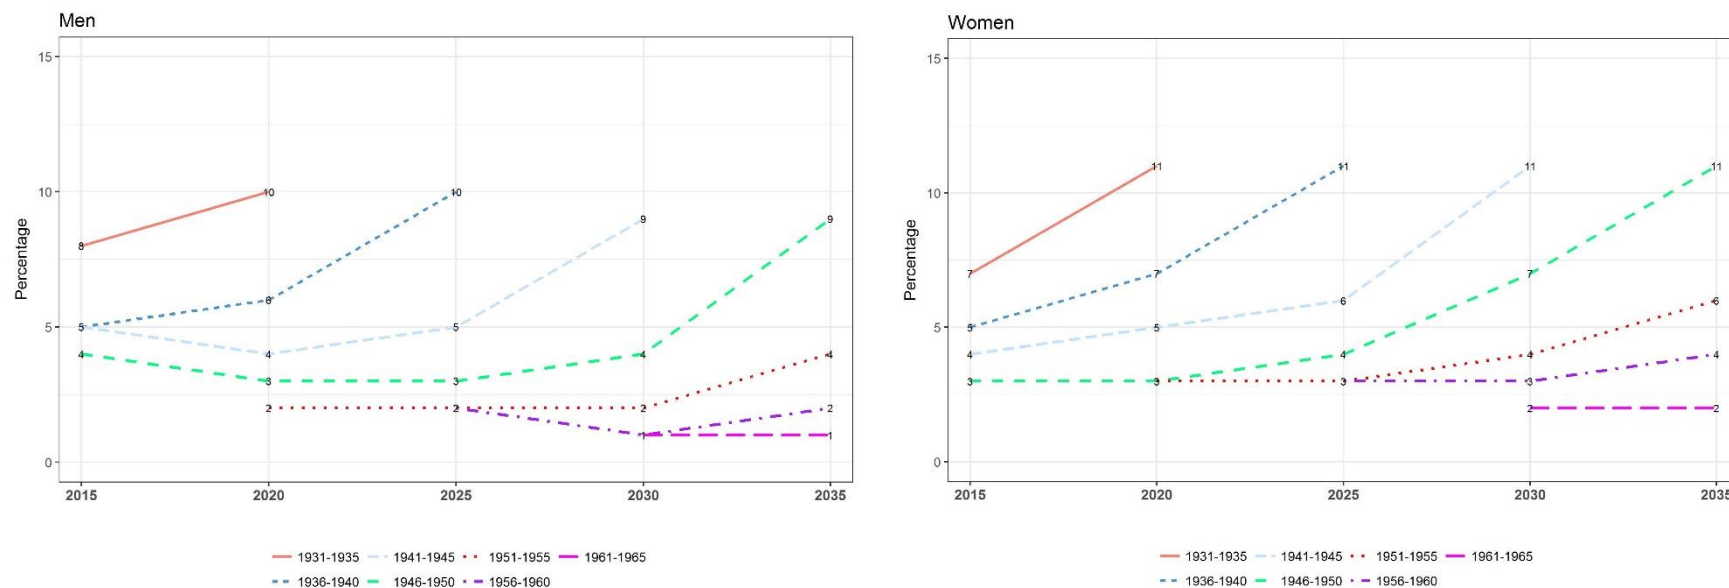

|           | Men           |                  |               |               |               |  | Women         |                  |                  |                  |                  |
|-----------|---------------|------------------|---------------|---------------|---------------|--|---------------|------------------|------------------|------------------|------------------|
| Cohort    | 2015          | 2020             | 2025          | 2030          | 2035          |  | 2015          | 2020             | 2025             | 2030             | 2035             |
| 1931-1935 | 8.2 (7.0-8.2) | 10.1 (10.1-10.9) |               |               |               |  | 6.9 (6.3-6.9) | 11.1 (10.6-11.2) |                  |                  |                  |
| 1936-1940 | 5.3 (5.0-5.5) | 5.8 (5.3-5.9)    | 9.6 (8.8-9.9) |               |               |  | 4.7 (4.3-4.7) | 6.9 (6.7-7.2)    | 10.5 (10.3-10.9) |                  |                  |
| 1941-1945 | 4.6 (4.0-4.6) | 4.2 (3.6-4.5)    | 5.3 (4.5-5.3) | 9.4 (8.7-9.5) |               |  | 4.0 (3.5-4.0) | 4.7 (4.5-5.0)    | 6.4 (6.3-6.7)    | 10.7 (10.6-11.0) |                  |
| 1946-1950 | 3.5 (3.3-3.5) | 2.9 (2.6-3.1)    | 3.1 (2.8-3.3) | 4.4 (4.1-4.5) | 9.4 (9.0-9.7) |  | 2.9 (2.8-3.1) | 3.3 (3.3-3.7)    | 4.5 (4.2-4.7)    | 6.5 (6.2-6.6)    | 11.2 (10.5-11.3) |
| 1951-1955 |               | 2.0 (1.9-2.2)    | 1.9 (1.7-1.9) | 2.3 (2.2-2.4) | 3.5 (3.3-3.9) |  |               | 2.7 (2.6-2.8)    | 2.9 (2.9-3.2)    | 4.0 (3.5-4.1)    | 5.6 (5.2-6.0)    |
| 1956-1960 |               |                  | 1.5 (1.2-1.5) | 1.5 (1.3-1.5) | 1.6 (1.6-2.0) |  |               |                  | 2.7 (2.7-3.0)    | 3.2 (2.8-3.2)    | 3.9 (3.9-4.2)    |
| 1961-1965 |               |                  |               | 0.9 (0.6-0.9) | 0.9 (0.8-1.1) |  |               |                  |                  | 1.8 (1.8-2.2)    | 2.2 (2.2-2.6)    |

Data in parentheses are minimum and maximum from ten simulation

Figure S.3: Proportion of older individuals with high dependency in England in 2015, 2020, 2025, 2030, 2035 by five year birth cohort and sex

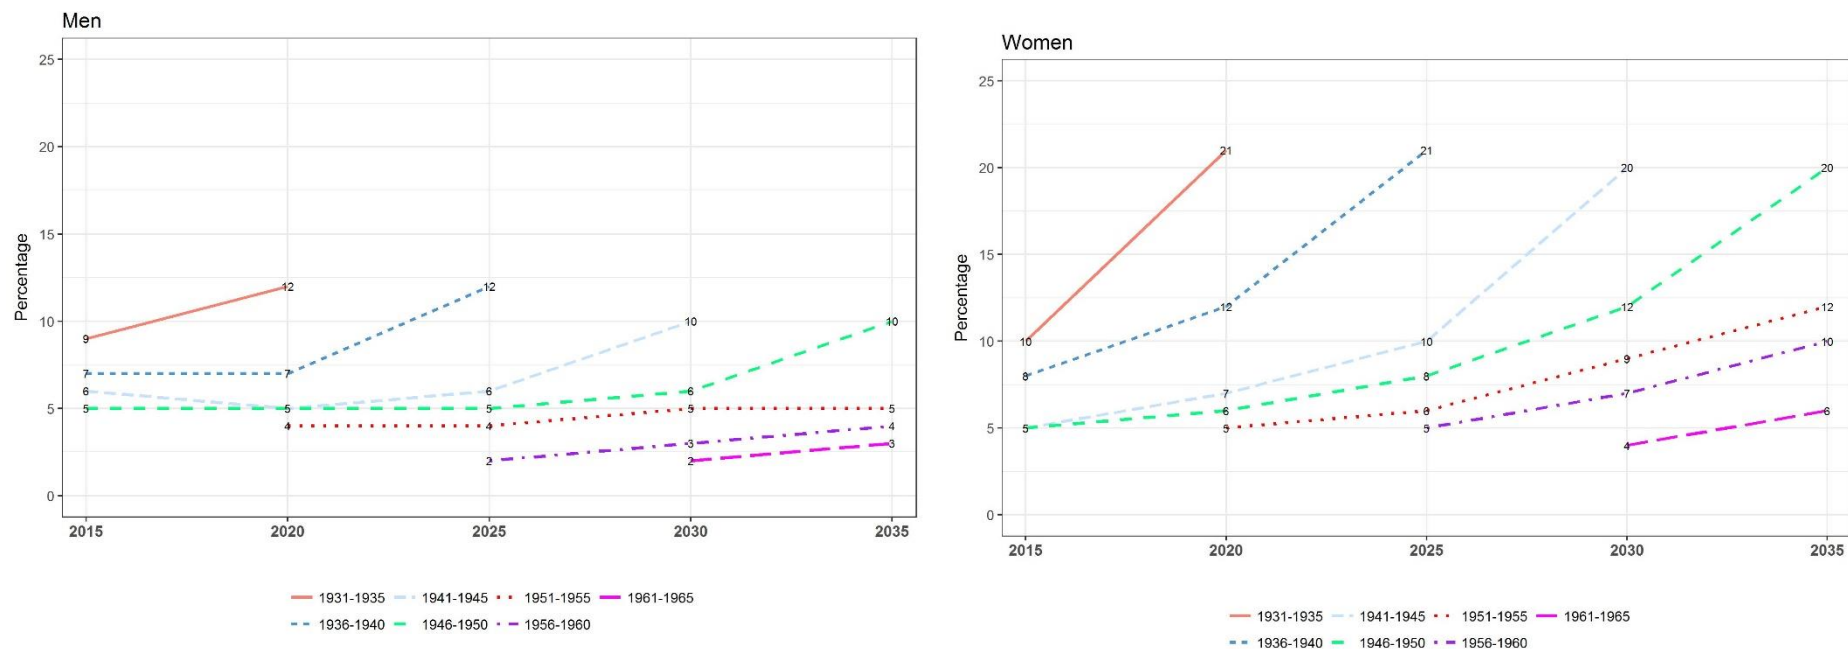

|           | Men            |                  |                  |                 |                 |  | Women          |                  |                  |                  |                  |
|-----------|----------------|------------------|------------------|-----------------|-----------------|--|----------------|------------------|------------------|------------------|------------------|
| Cohort    | 2015           | 2020             | 2025             | 2030            | 2035            |  | 2015           | 2020             | 2025             | 2030             | 2035             |
| 1931-1935 | 9.4 (9.4-10.2) | 12.2 (12.1-12.9) |                  |                 |                 |  | 9.8 (9.4-10.0) | 21.4 (20.6-21.5) |                  |                  |                  |
| 1936-1940 | 6.9 (6.4-6.9)  | 7.2 (6.7-7.4)    | 11.7 (10.9-11.8) |                 |                 |  | 8.3 (8.3-8.8)  | 11.7 (11.5-12.3) | 21.4 (20.9-21.6) |                  |                  |
| 1941-1945 | 5.8 (5.7-6.0)  | 5.5 (5.2-5.7)    | 6.1 (5.8-6.5)    | 10.4 (9.6-10.5) |                 |  | 5.4 (5.2-5.4)  | 7.3 (6.5-7.3)    | 10.4 (9.6-10.6)  | 20.3 (19.2-20.5) |                  |
| 1946-1950 | 5.1 (4.8-5.1)  | 4.6 (4.3-4.8)    | 4.9 (4.8-5.3)    | 6.0 (5.9-6.2)   | 10.0 (9.3-10.0) |  | 5.4 (5.3-5.6)  | 6.3 (6.0-6.3)    | 8.4 (8.2-8.7)    | 12.0 (11.4-12.4) | 20.1 (20.0-20.5) |
| 1951-1955 |                | 3.6 (3.4-3.7)    | 3.7 (3.7-4.0)    | 4.6 (4.4-4.8)   | 5.4 (5.4-6.4)   |  |                | 4.6 (4.2-4.6)    | 6.5 (5.7-6.5)    | 9.1 (8.2-9.1)    | 12.4 (11.6-12.5) |
| 1956-1960 |                |                  | 2.5 (2.4-2.7)    | 3.1 (3.0-3.4)   | 4.2 (4.0-4.4)   |  |                |                  | 4.9 (4.6-5.2)    | 6.9 (6.5-7.1)    | 9.8 (9.2-9.8)    |
| 1961-1965 |                |                  |                  | 1.8 (1.5-1.8)   | 2.5 (2.3-2.6)   |  |                |                  |                  | 4.2 (4.0-4.3)    | 6.4 (6.1-6.7)    |

Data in parentheses are minimum and maximum from ten simulation

## Methods

### ***Base population***

To enable estimates for the population aged  $\geq 65$  years to be simulated 2040, the base population for PACSim required individuals aged  $\geq 35$  years. Three longitudinal studies were pooled to construct the base population and one follow-up wave (generally around two years later) for calculation of the transition probabilities: Understanding Society (US), the English Longitudinal Study of Ageing (ELSA), and the Cognitive Function and Ageing Study II (CFAS II). US is a longitudinal study of the social and economic circumstances, attitudes, behaviours and health of people aged 16 and over in the UK; we used wave 1 (2009-10) and wave 2 (2010-11). ELSA provided data on the health, social, wellbeing and economic circumstances of the English population aged 50 and older; we used wave 5 (2010-11) for the baseline and wave 6. CFAS II aims to investigate dementia and cognitive decline in a representative sample of more than 18,000 people aged 65 years and over; only two waves have been completed, wave 1 (2008-11) and wave 2 (2011-13). Comparisons of the major characteristics available in all studies at baseline (education, smoking, all chronic conditions and sensory impairment) by age group and study are shown in Figures S.4 – S.7.

### ***Transition probabilities***

For all three datasets there was an interval of two years between waves for estimation of transition probabilities for each characteristic (apart from education and social class which were fixed). For the remaining stochastic characteristics (diseases, health behaviours, physical dependency) transition probabilities were estimated from fitting generalised linear models to the pooled dataset. Where missing values were imputed for a whole study (e.g. BMI in CFAS, cognitive impairment in Understanding Society) we excluded the study from estimation of the transition probabilities.

Most diseases were considered chronic and therefore only incidence (transition to disease) was estimated; the exception was depression where the probability of recovery was also estimated. Similarly, recovery for vision and hearing impairment were modelled in addition to transition from mild cognitive impairment (MMSE 21-26) to normal cognition (MMSE 27-30). For physical activity, there was insufficient data to model transitions, therefore the transition probabilities were approximated by fitting models to the baseline data only. Transition probabilities for BMI used ELSA waves 4 and 6 as BMI was not collected in wave 5. For ordered categorical characteristics (BMI, physical dependency, cognitive function) ordinal logistic models could not be fitted as the proportional odds assumption was violated, and therefore a generalised logit model was fitted.

The modelled transition relationships between variables are shown in Table S.9 with  $\vee$  denoting a significant association. If variables (apart from age and sex) were not significant in the model, the coefficient was replaced by zero (and shown in Table S.9 by X).

### ***Model validation***

Validation against external data sources is difficult as the base population for PACSim included the three major national (or nationally representative) longitudinal studies. The number of individuals by five-year age group (65-69, 70-74, 75-79, 80-84, 85-89, 90+) and year (2014-2041) from PACSim were compared to the ONS 2014 population projections; the largest percentage difference was in the oldest age groups (90+) which reached over 2.5% between 2022 and 2025; for ages 65-84 the percentage difference in numbers of individuals between PACSim and ONS was under 1% and mostly below 0.5% throughout (Figure S.8). We also compared the estimates of forecasted life expectancy at age 65 with those from ONS (Table S.10); differences were small.

Table S.9: Modelled transition relationships between variables

|                        | Predictors |     |           |                |            |         |     |                   |                        |        |              |          |           |            |             |        |        |         |           |            |
|------------------------|------------|-----|-----------|----------------|------------|---------|-----|-------------------|------------------------|--------|--------------|----------|-----------|------------|-------------|--------|--------|---------|-----------|------------|
|                        | Age        | Sex | Education | Marital status | Occupation | Smoking | BMI | Physical activity | Coronary Heart Disease | Stroke | Hypertension | Diabetes | Arthritis | Depression | Respiratory | Cancer | Vision | Hearing | Cognition | Dependency |
| Marital status         | √          | √   |           |                |            |         |     |                   |                        |        |              |          |           |            |             |        |        |         |           |            |
| Smoking                | √          | √   | X         | X              |            |         |     |                   |                        |        |              |          |           |            |             |        |        |         |           |            |
| BMI                    | √          | √   | √         |                |            |         |     |                   |                        |        |              |          |           |            |             |        |        |         |           |            |
| Physical activity      | √          | √   | √         |                |            |         | √   |                   |                        |        |              |          |           |            |             |        |        |         |           |            |
| Coronary Heart Disease | √          | √   |           |                |            | X       | √   | √                 |                        |        | X            | X        |           |            |             |        |        |         |           |            |
| Stroke                 | √          | √   |           |                |            | √       | √   |                   |                        |        | √            |          |           |            |             |        |        |         |           |            |
| Hypertension           | √          | √   | √         |                |            | X       | √   | X                 |                        |        |              |          |           |            |             |        |        |         |           |            |
| Diabetes               | √          | √   | √         |                |            | X       | √   | √                 |                        |        | √            |          |           |            |             |        |        |         |           |            |
| Arthritis              | √          | √   |           |                |            |         | √   |                   |                        |        |              |          |           |            |             |        |        |         |           |            |
| Depression             | √          | √   |           | √              |            |         |     | √                 |                        |        |              |          |           |            |             |        |        |         |           |            |
| Respiratory disease    | √          | √   | X         |                | X          | √       | √   |                   |                        |        |              |          |           |            |             |        |        |         |           |            |
| Cancer                 | √          | √   |           |                |            | X       | X   |                   |                        |        |              |          |           |            |             |        |        |         |           |            |
| Vision                 | √          | √   | √         |                |            | √       |     |                   |                        |        |              |          |           |            |             |        |        |         |           |            |
| Hearing                | √          | √   | √         |                |            | √       |     |                   |                        |        |              |          |           |            |             |        |        |         |           |            |
| Cognition              | √          | √   | √         |                |            | √       | √   | √                 |                        | √      | √            | √        |           | √          |             |        | √      | √       |           |            |
| Dependency             | √          | √   | √         |                |            |         |     |                   | √                      | √      | √            | √        | √         | √          | √           | √      | √      | X       | √         |            |
| Retirement             | √          | √   | X         |                | X          |         |     |                   | √                      |        | √            |          | √         | √          | X           |        |        |         |           |            |
| Institution            | √          | √   | √         | √              |            |         |     |                   |                        |        |              |          |           |            |             |        |        |         | √         | √          |

√ = significant predictor, X = entered into transition model but not significant

**Table S.10: Life expectancies at age 65 from PACSim (with range from repeated simulations) and from ONS 2014 projections, 2015, 2025, 2035 by sex**

|              |        | Life expectancy at age 65 |                    |                    |
|--------------|--------|---------------------------|--------------------|--------------------|
|              |        | 2015                      | 2025               | 2035               |
| <b>Men</b>   |        |                           |                    |                    |
|              | PACSim | 18.7 (18.3 - 19.0)        | 20.7 (20.5 - 21.0) | 22.2 (21.7 - 22.4) |
|              | ONS    | 18.9                      | 20.8               | 22.1               |
| <b>Women</b> |        |                           |                    |                    |
|              | PACSim | 21.1 (20.8 - 21.1)        | 22.7 (22.5 - 23.3) | 24.1 (23.9 - 24.4) |
|              | ONS    | 21.2                      | 22.9               | 24.1               |

Figure S.4: Comparison of baseline proportion with low education and proportion of current smokers by study and age group

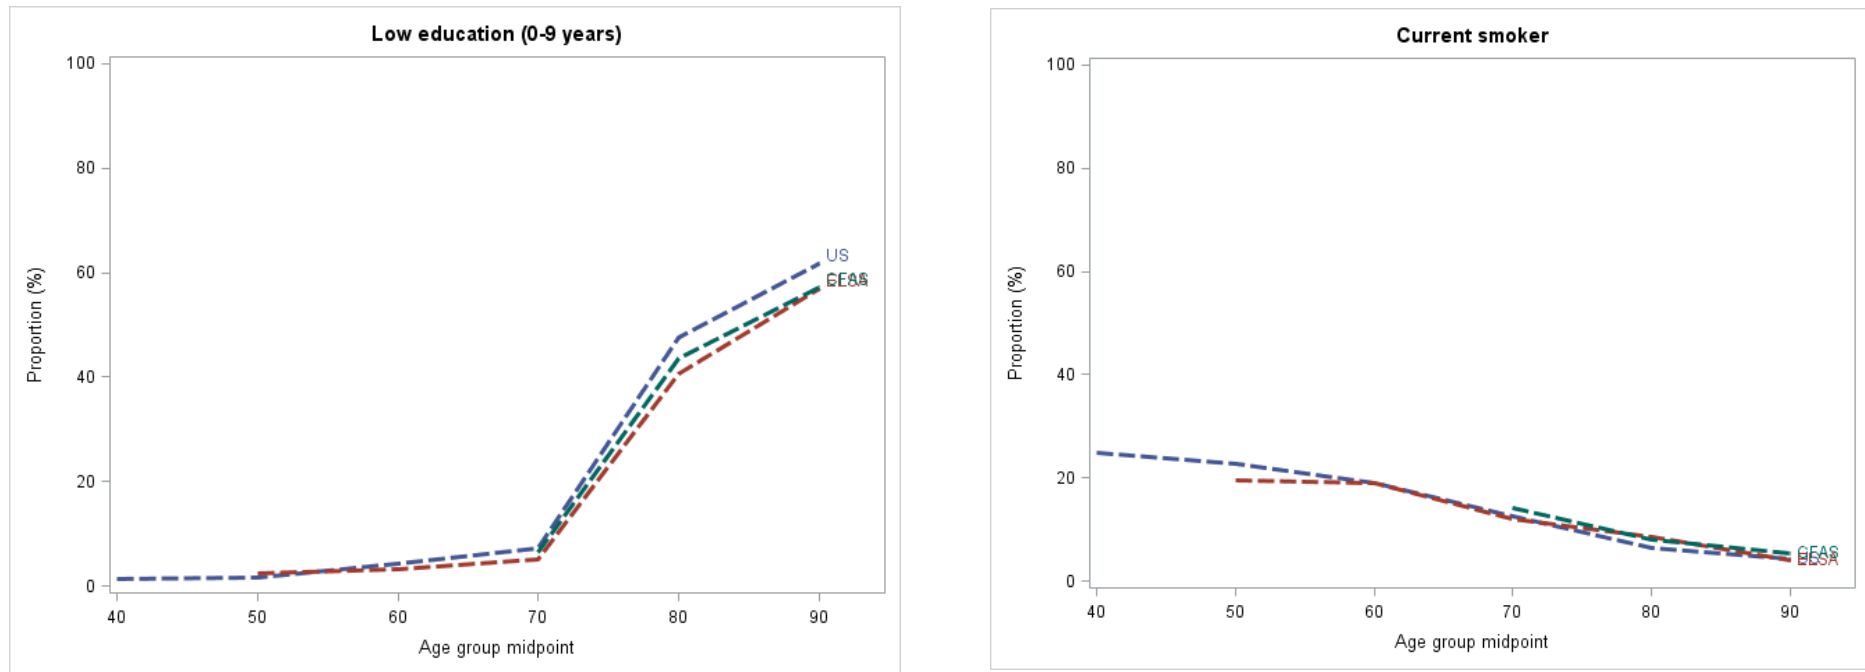

**Figure S.5: Comparison of baseline proportion with hypertension, coronary heart disease (CHD), stroke, and diabetes by study and age group**

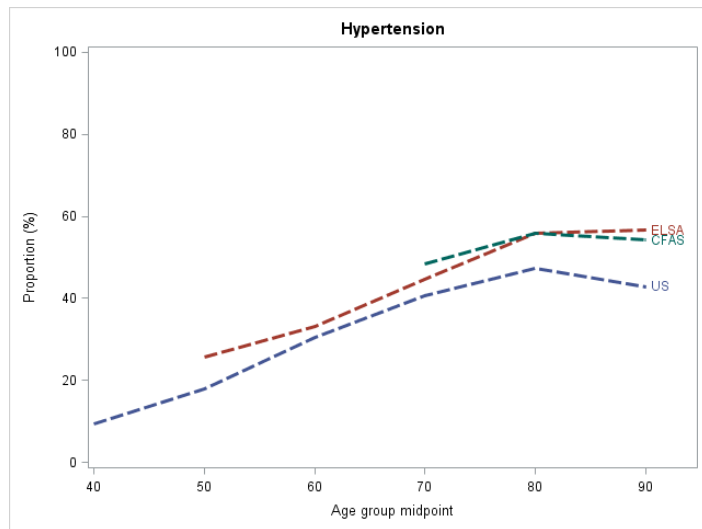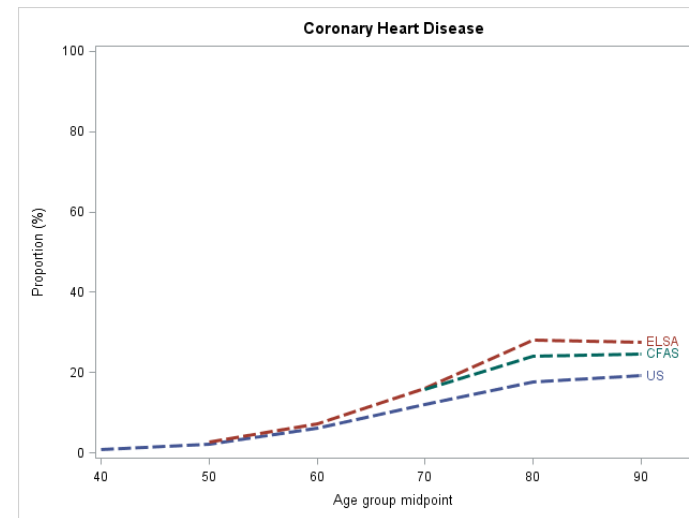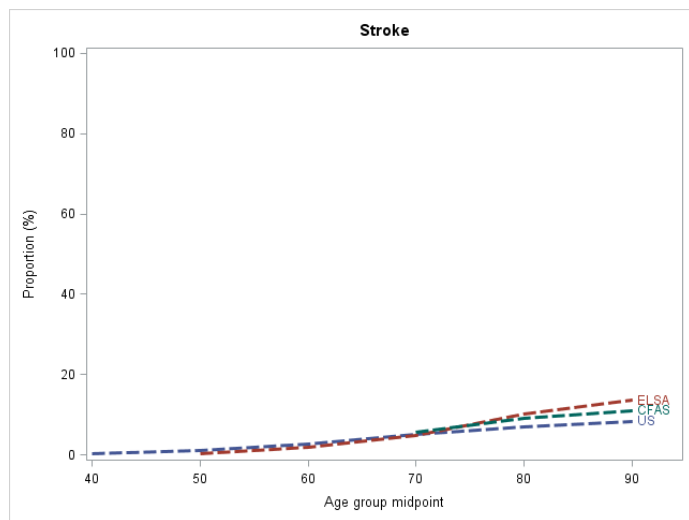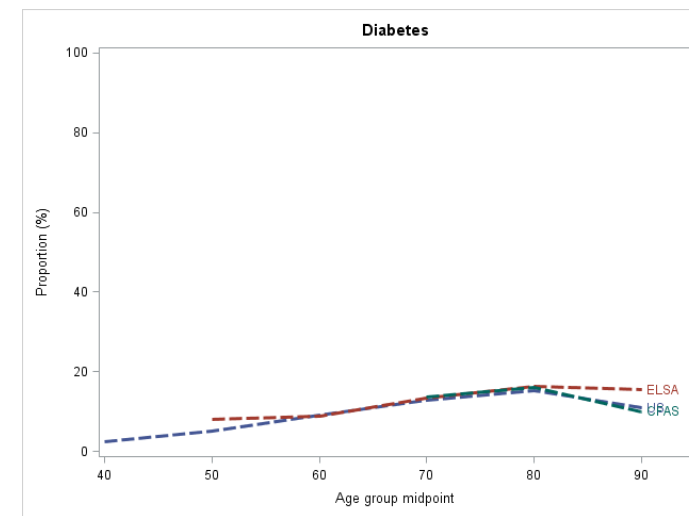

**Figure S.6: Comparison of baseline proportion with arthritis, respiratory disease, cancer, and depression by study and age group**

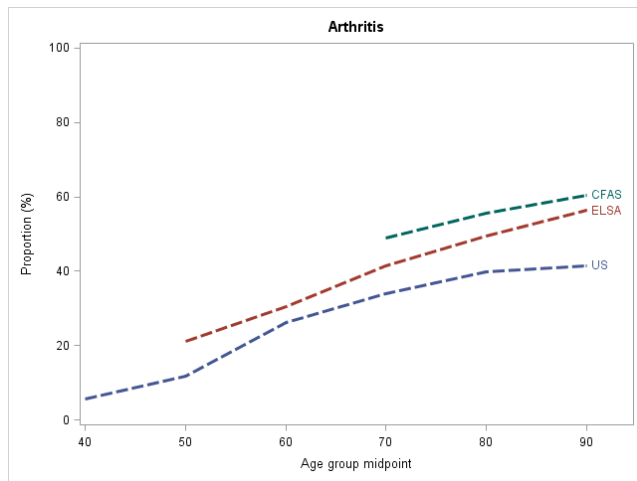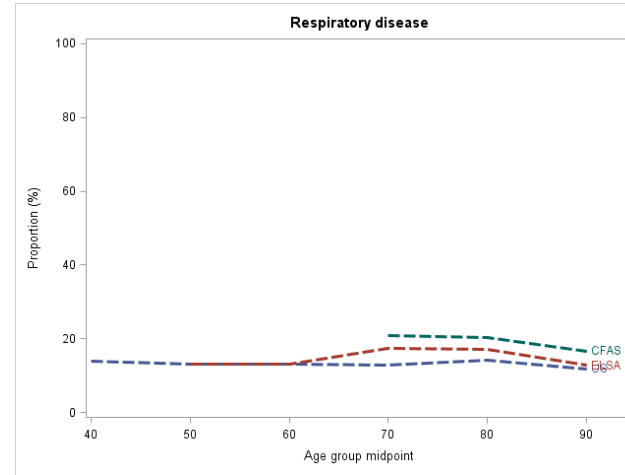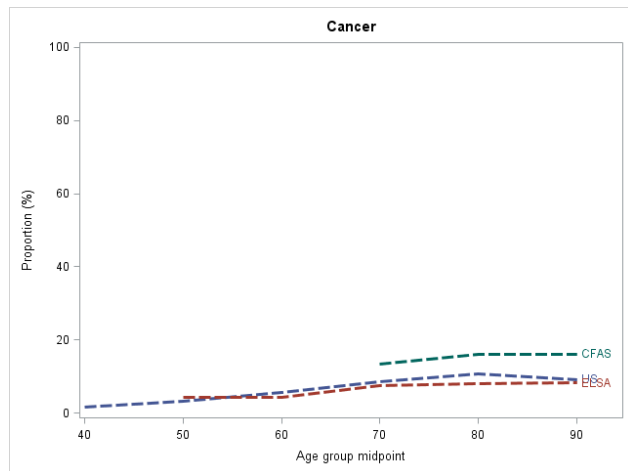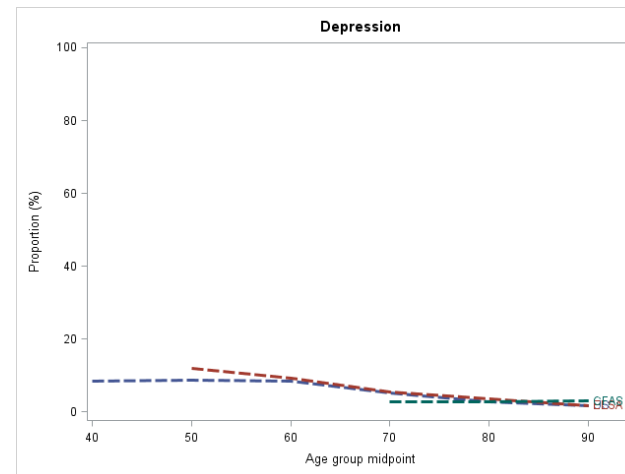

Figure S.7: Comparison of baseline proportion with hearing and visual impairment by study and age group

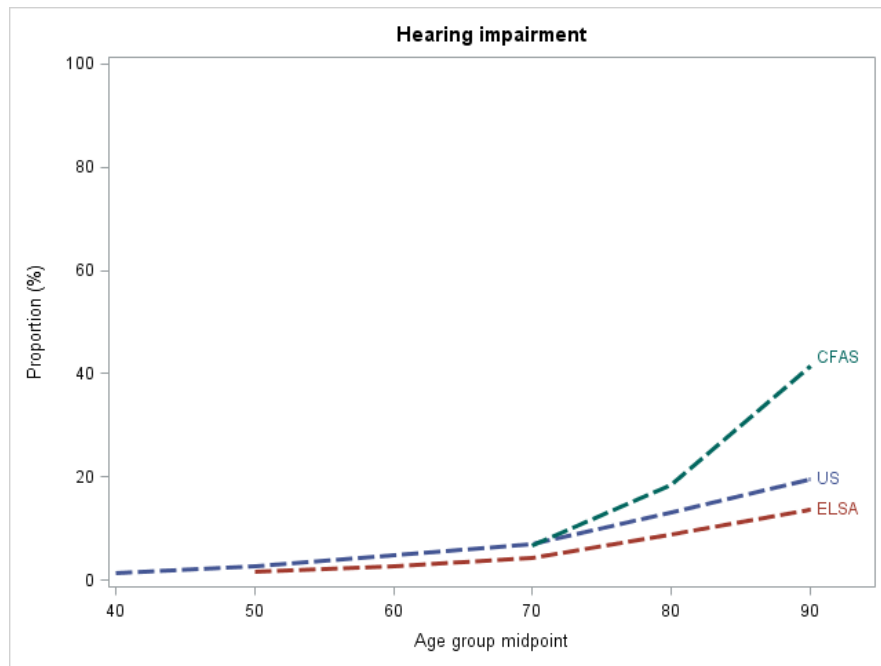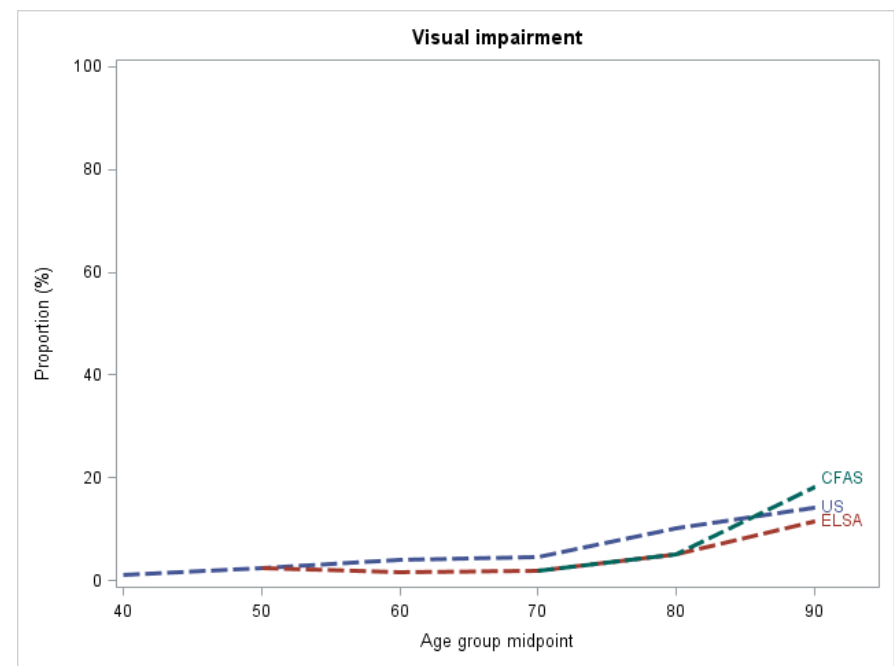

Figure S.8: Comparison of number of individuals in England by age group and year from PACSim with ONS 2014-based population projections

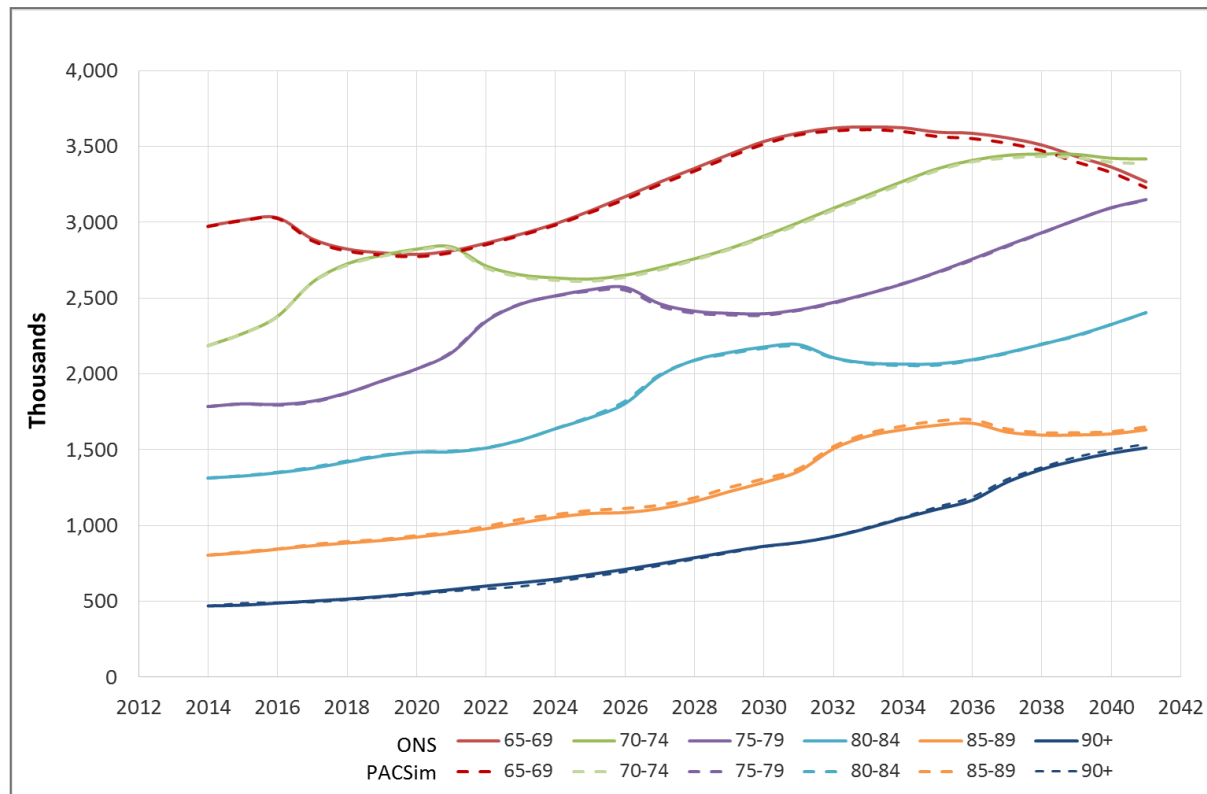

## Research in context

We reviewed existing evidence in January 2018 for simulation models forecasting dependency or care needs worldwide. We searched both Medline and Web of Science with the following search terms:

("Disabled Persons"[Mesh] OR "Life Expectancy"[Mesh] OR Disab\*[ti]

OR Longevit\*[ti] OR Life expectan\*[ti])

AND

("Computer Simulation"[Mesh] OR "Forecasting"[Mesh] OR "Population Forecast"[Mesh] OR

Simulat\*[ti] OR Model\*[ti] OR forecast\*[ti] OR project\*)

A review of abstracts identified relevant articles which were then extracted; references of relevant articles were hand searched for further articles. We focused on dynamic microsimulation models, as PACSim, and identified five such models in Canada, England, Japan, New Zealand and the United States (detailed in Table S.11).

**Table S.11: Results of literature review on dynamic microsimulation models**

| <b>Author</b>                      | <b>Title</b>                                                                                                       | <b>Population</b> | <b>Age</b> | <b>Time horizon</b> | <b>Outcomes</b>                                                                                              | <b>Risk factors included</b>                                                                            |
|------------------------------------|--------------------------------------------------------------------------------------------------------------------|-------------------|------------|---------------------|--------------------------------------------------------------------------------------------------------------|---------------------------------------------------------------------------------------------------------|
| Legare et al <sup>1</sup>          | Using microsimulation to reassess aging trends in Canada                                                           | Canada            | 20+        | 2001-2051           | Disability (none, mild, moderate, severe)                                                                    | education, marital status, age at immigration                                                           |
| Guzman-Castillo et al <sup>2</sup> | Forecasted trends in disability and life expectancy in England and Wales up to 2025: a modelling study             | England           | 65+        | 2015-2025           | ADL disability (1+)                                                                                          | cardiovascular disease, cognitive impairment                                                            |
| Chen et al <sup>3</sup>            | Forecasting trends in disability in a super-aging society: Adapting the Future Elderly Model to Japan              | Japan             | 50+        | 2014-2040           | ADL disability (0,1,2,3+), IADL disability (0,1,2,3+), social functioning (0,1,2,3+), help received (yes/no) | smoking, BMI, 19 diseases                                                                               |
| Lay-Yee et al <sup>4</sup>         | Changing the balance of social care for older people: simulating scenarios under demographic ageing in New Zealand | New Zealand       | 65+        | 2001-2021           | use of social care (informal, formal, residential)                                                           | ethnicity, deprivation level, partnership status, disability (assistance in activities of daily living) |
| Goldman et al <sup>5</sup>         | Consequences of health trends and medical innovation for the future elderly                                        | US                | 65+        | 2000-2030           | disability (1+ADLs, 3+ADLs, nursing home)                                                                    | education, race, ethnicity, smoking, BMI, 8 health conditions                                           |

## References

1. Legare J, Decarie Y, Belanger A. Using microsimulation to reassess aging trends in Canada. *Canadian journal on aging = La revue canadienne du vieillissement* 2014; **33**(2): 208-19.
2. Guzman-Castillo M, Ahmadi-Abhari S, Bandosz P, et al. Forecasted trends in disability and life expectancy in England and Wales up to 2025: a modelling study. *The Lancet Public Health* 2017; **2**(7): e307-e13.
3. Chen BK, Jalal H, Hashimoto H, et al. Forecasting trends in disability in a super-aging society: Adapting the Future Elderly Model to Japan. *Journal of the Economics of Ageing* 2016; **8**: 42-51.
4. Lay-Yee R, Pearson J, Davis P, von Randow M, Kerse N, Brown L. Changing the balance of social care for older people: simulating scenarios under demographic ageing in New Zealand. *Health & Social Care in the Community* 2017; **25**(3): 962-74.
5. Goldman DP, Shang B, Bhattacharya J, et al. Consequences of health trends and medical innovation for the future elderly. *Health affairs (Project Hope)* 2005; **24 Suppl 2**: W5r-17.
